# Supplementary figures and images for: Risk factor analysis of equine strongyle resistance to anthelmintics
Source: PubMed Central journal article supplement — Int J Parasitol Drugs Drug Resist. 2017 Nov 2;7(3):407–15. doi: 10.1016/j.ijpddr.2017.10.007 (PMC5727347; doi:10.1016/j.ijpddr.2017.10.007), 2017-11-02

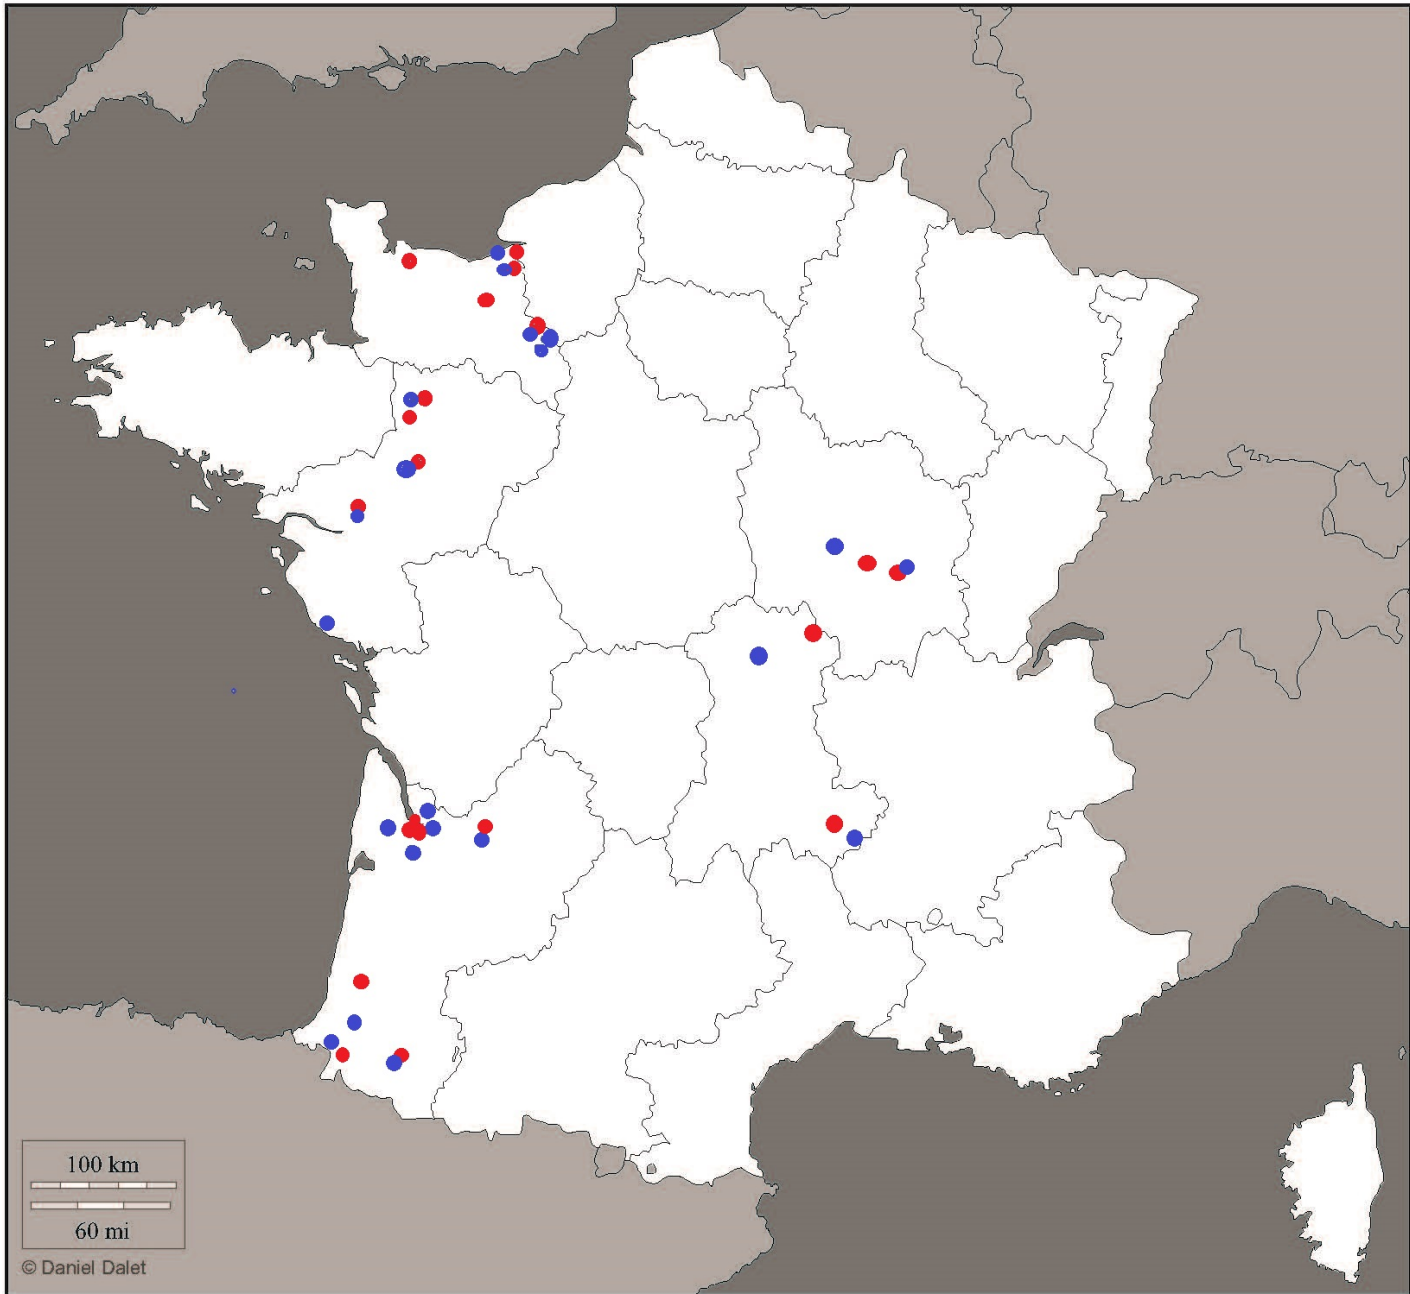

Supplement: mmc1.pdf [file mmc1.pdf]
